# Supplementary material for: Neurological outcomes after traumatic cardiopulmonary arrest: a systematic review
Source: PubMed Central journal article supplement — Trauma Surg Acute Care Open. 2021 Nov 5;6(1):e000817. doi: 10.1136/tsaco-2021-000817 (PMC8573669; doi:10.1136/tsaco-2021-000817), 2021-11-05
Supplement: tsaco-2021-000817supp001.pdf [file tsaco-2021-000817supp001.pdf]

**Supplementary Table 1: Search Strategies**

| <b>Search Strategy for Medline</b> |                                                                                                                                                                                                                                                                                                                                                                                                                                                                                                                                                 |
|------------------------------------|-------------------------------------------------------------------------------------------------------------------------------------------------------------------------------------------------------------------------------------------------------------------------------------------------------------------------------------------------------------------------------------------------------------------------------------------------------------------------------------------------------------------------------------------------|
| #                                  | Searches                                                                                                                                                                                                                                                                                                                                                                                                                                                                                                                                        |
| 1                                  | exp Cardiopulmonary resuscitation/                                                                                                                                                                                                                                                                                                                                                                                                                                                                                                              |
| 2                                  | exp Resuscitation/                                                                                                                                                                                                                                                                                                                                                                                                                                                                                                                              |
| 3                                  | cardio*.mp.                                                                                                                                                                                                                                                                                                                                                                                                                                                                                                                                     |
| 4                                  | 2 and 3                                                                                                                                                                                                                                                                                                                                                                                                                                                                                                                                         |
| 5                                  | cpr.mp.                                                                                                                                                                                                                                                                                                                                                                                                                                                                                                                                         |
| 6                                  | cardiopulmonary resuscitation*.mp.                                                                                                                                                                                                                                                                                                                                                                                                                                                                                                              |
| 7                                  | 1 or 4 or 5 or 6                                                                                                                                                                                                                                                                                                                                                                                                                                                                                                                                |
| 8                                  | exp Heart Arrest/                                                                                                                                                                                                                                                                                                                                                                                                                                                                                                                               |
| 9                                  | cardiopulmonary arrest*.mp.                                                                                                                                                                                                                                                                                                                                                                                                                                                                                                                     |
| 10                                 | heart arrest*.mp.                                                                                                                                                                                                                                                                                                                                                                                                                                                                                                                               |
| 11                                 | asystole.mp.                                                                                                                                                                                                                                                                                                                                                                                                                                                                                                                                    |
| 12                                 | exp Out-of-Hospital Cardiac Arrest/                                                                                                                                                                                                                                                                                                                                                                                                                                                                                                             |
| 13                                 | pulselessness.mp.                                                                                                                                                                                                                                                                                                                                                                                                                                                                                                                               |
| 14                                 | 8 or 9 or 10 or 11 or 12 or 13                                                                                                                                                                                                                                                                                                                                                                                                                                                                                                                  |
| 15                                 | exp "Wounds and Injuries"/                                                                                                                                                                                                                                                                                                                                                                                                                                                                                                                      |
| 16                                 | trauma*.mp.                                                                                                                                                                                                                                                                                                                                                                                                                                                                                                                                     |
| 17                                 | exp Accidents, Traffic/                                                                                                                                                                                                                                                                                                                                                                                                                                                                                                                         |
| 18                                 | wound*.mp.                                                                                                                                                                                                                                                                                                                                                                                                                                                                                                                                      |
| 19                                 | traffic accident*.mp.                                                                                                                                                                                                                                                                                                                                                                                                                                                                                                                           |
| 20                                 | 15 or 16 or 17 or 18 or 19                                                                                                                                                                                                                                                                                                                                                                                                                                                                                                                      |
| 21                                 | 7 and 14 and 20                                                                                                                                                                                                                                                                                                                                                                                                                                                                                                                                 |
| <b>Search Strategy for Embase</b>  |                                                                                                                                                                                                                                                                                                                                                                                                                                                                                                                                                 |
| 1                                  | exp resuscitation/                                                                                                                                                                                                                                                                                                                                                                                                                                                                                                                              |
| 2                                  | cardio*.mp.                                                                                                                                                                                                                                                                                                                                                                                                                                                                                                                                     |
| 3                                  | 1 and 2                                                                                                                                                                                                                                                                                                                                                                                                                                                                                                                                         |
| 4                                  | cardiopulmonary resuscitation*.mp.                                                                                                                                                                                                                                                                                                                                                                                                                                                                                                              |
| 5                                  | cpr.mp.                                                                                                                                                                                                                                                                                                                                                                                                                                                                                                                                         |
| 6                                  | 3 or 4 or 5                                                                                                                                                                                                                                                                                                                                                                                                                                                                                                                                     |
| 7                                  | exp Heart Arrest/                                                                                                                                                                                                                                                                                                                                                                                                                                                                                                                               |
| 8                                  | cardiopulmonary arrest*.mp.                                                                                                                                                                                                                                                                                                                                                                                                                                                                                                                     |
| 9                                  | heart arrest*.mp.                                                                                                                                                                                                                                                                                                                                                                                                                                                                                                                               |
| 10                                 | asystole.mp.                                                                                                                                                                                                                                                                                                                                                                                                                                                                                                                                    |
| 11                                 | out of hospital cardiac arrest*.mp.                                                                                                                                                                                                                                                                                                                                                                                                                                                                                                             |
| 12                                 | pulselessness.mp.                                                                                                                                                                                                                                                                                                                                                                                                                                                                                                                               |
| 13                                 | 7 or 8 or 9 or 10 or 11 or 12                                                                                                                                                                                                                                                                                                                                                                                                                                                                                                                   |
| 14                                 | injury/ or abrasion/ or accidental injury/ or avulsion injury/ or battle injury/ or "bites and stings"/ or blunt trauma/ or burn/ or chemical injury/ or concussion/ or contrecoup injury/ or contusion/ or crush trauma/ or electric injury/ or "head and neck injury"/ or heart injury/ or limb injury/ or multiple trauma/ or musculoskeletal injury/ or nervous system injury/ or organ injury/ or pelvis injury/ or skin injury/ or traumatic hematoma/ or traumatic shock/ or abdominal penetrating trauma/ or thorax penetrating trauma/ |

|                                   |                                                                                                                                                                                                                                                                                                    |
|-----------------------------------|----------------------------------------------------------------------------------------------------------------------------------------------------------------------------------------------------------------------------------------------------------------------------------------------------|
| 15                                | exp wound/                                                                                                                                                                                                                                                                                         |
| 16                                | trauma*.mp.                                                                                                                                                                                                                                                                                        |
| 17                                | exp traffic accident/                                                                                                                                                                                                                                                                              |
| 18                                | wound*.mp.                                                                                                                                                                                                                                                                                         |
| 19                                | traffic accident*.mp.                                                                                                                                                                                                                                                                              |
| 20                                | exp injury scale/                                                                                                                                                                                                                                                                                  |
| 21                                | 14 or 15 or 16 or 17 or 18 or 19 or 20                                                                                                                                                                                                                                                             |
| 22                                | 6 and 13 and 21                                                                                                                                                                                                                                                                                    |
| <b>Search Strategy for PubMed</b> |                                                                                                                                                                                                                                                                                                    |
| 1                                 | cardiopulmonary resuscitation[MeSH Terms]                                                                                                                                                                                                                                                          |
| 2                                 | ((resuscitation[MeSH Terms]) AND (cardio*))                                                                                                                                                                                                                                                        |
| 3                                 | (cardiopulmonary resuscitation*) OR (cpr[MeSH Terms])                                                                                                                                                                                                                                              |
| 4                                 | #1 OR #2 OR #3                                                                                                                                                                                                                                                                                     |
| 5                                 | (((((heart arrest[MeSH Terms]) OR (asystole[MeSH Terms])) OR (cardiac arrest[MeSH Terms])) OR (arrest, cardiopulmonary[MeSH Terms])) OR (pulselessness*)) OR (heart arrest*)) OR (asystole*)) OR (cardiopulmonary arrest*)) OR (cardiac arrest*)) OR (cardiac arrest, out of hospital[MeSH Terms]) |
| 6                                 | ((wounds and injuries[MeSH Terms]) OR (trauma[MeSH Terms])) OR (accident, traffic[MeSH Terms])                                                                                                                                                                                                     |
| 7                                 | ((trauma*) OR (traffic accident*)) OR (wound*)                                                                                                                                                                                                                                                     |
| 8                                 | #12 OR #13                                                                                                                                                                                                                                                                                         |
| 9                                 | #4 AND #5 AND #14                                                                                                                                                                                                                                                                                  |
| <b>Search Strategy for CINAHL</b> |                                                                                                                                                                                                                                                                                                    |
| 1                                 | (MH "Resuscitation, Cardiopulmonary+")                                                                                                                                                                                                                                                             |
| 2                                 | (MH "Resuscitation+")                                                                                                                                                                                                                                                                              |
| 3                                 | "cardio*"                                                                                                                                                                                                                                                                                          |
| 4                                 | S2 AND S3                                                                                                                                                                                                                                                                                          |
| 5                                 | "cpr"                                                                                                                                                                                                                                                                                              |
| 6                                 | "cardiopulmonary resuscitation"                                                                                                                                                                                                                                                                    |
| 7                                 | S1 OR S4 OR S5 OR S6                                                                                                                                                                                                                                                                               |
| 8                                 | (MH "Heart Arrest+")                                                                                                                                                                                                                                                                               |
| 9                                 | "cardiopulmonary arrest*"                                                                                                                                                                                                                                                                          |
| 10                                | "heart arrest*"                                                                                                                                                                                                                                                                                    |
| 11                                | "asystole"                                                                                                                                                                                                                                                                                         |
| 12                                | "pulselessness"                                                                                                                                                                                                                                                                                    |
| 13                                | S8 OR S9 OR S10 OR S11 OR S12                                                                                                                                                                                                                                                                      |
| 14                                | (MH "Trauma+")                                                                                                                                                                                                                                                                                     |
| 15                                | (MH "Wounds and Injuries+")                                                                                                                                                                                                                                                                        |
| 16                                | (MH "Accidents, Traffic")                                                                                                                                                                                                                                                                          |
| 17                                | S14 OR S15 OR S16                                                                                                                                                                                                                                                                                  |
| 18                                | S7 AND S13 AND S17                                                                                                                                                                                                                                                                                 |
| 19                                | TI((animal or animals or canine* or dog or dogs or feline or hamster* or lamb or lambs or mice or monkey or monkeys or mouse or murine or pig or pigs or piglet* or porcine or swine or primate* or rabbit* or rats or rat or rodent* or sheep*) NOT (human* or patient*))                         |

|                                     |                                                                                                                                                                                                                                                                                                                                                                                                                                                                                            |
|-------------------------------------|--------------------------------------------------------------------------------------------------------------------------------------------------------------------------------------------------------------------------------------------------------------------------------------------------------------------------------------------------------------------------------------------------------------------------------------------------------------------------------------------|
| 20                                  | S18 not S19                                                                                                                                                                                                                                                                                                                                                                                                                                                                                |
| <b>Search Strategy for ProQuest</b> |                                                                                                                                                                                                                                                                                                                                                                                                                                                                                            |
| 1                                   | (su(cardiopulmonary resuscitation) OR su(cpr) OR (cardiopulmonary resuscitation* ti., ab.) OR (cpr ti., ab.)) AND (su(Heart Arrest) OR su(Out-Of-Hospital Cardiac Arrest) OR su(Asystole) OR su(Cardiac Arrest) OR (heart arrest ti., ab.) OR (asystole ti., ab.) OR (Out-Of-Hospital Cardiac Arrest ti., ab.) OR (cardiac arrest ti., ab.) OR (pulselessness ti., ab.)) AND (su(Wounds AND Injuries) OR su(Trauma) OR su(Accidents, traffic) OR wound* OR (traffic accident*) OR trauma*) |
